# Supplementary material for: Polygenic risk scores for autoimmune related diseases are significantly different in cancer exceptional responders
Source: PubMed Central journal article supplement (PMC11127926; doi:10.1038/s41698-024-00613-x), 2024-05-25
Supplement: 41698_2024_613_MOESM1_ESM.pdf [file 41698_2024_613_MOESM1_ESM.pdf]

## Supplementary Figures

Supplementary Figure 1. Histograms of 7 autoimmune related disease PRSs in NEER and PCAWG.

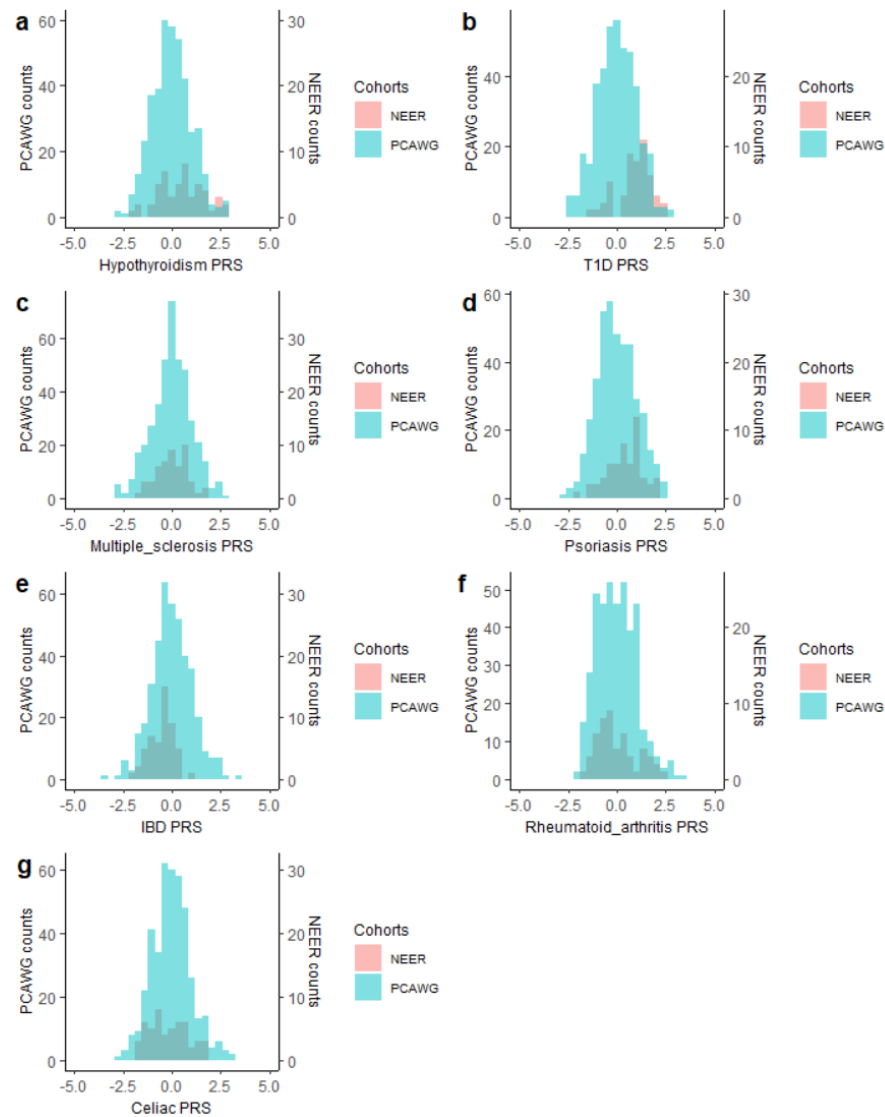

The histograms show the distribution of PRSs without being smoothed. The main y axis (left) shows counts of PCAWG typical patients with the given binned PRS, while the second y axis (right) shows the counts of NEER ERs.

Supplementary Figure 2. Survival curves of PCAWG patients stratified by high vs low PRSs

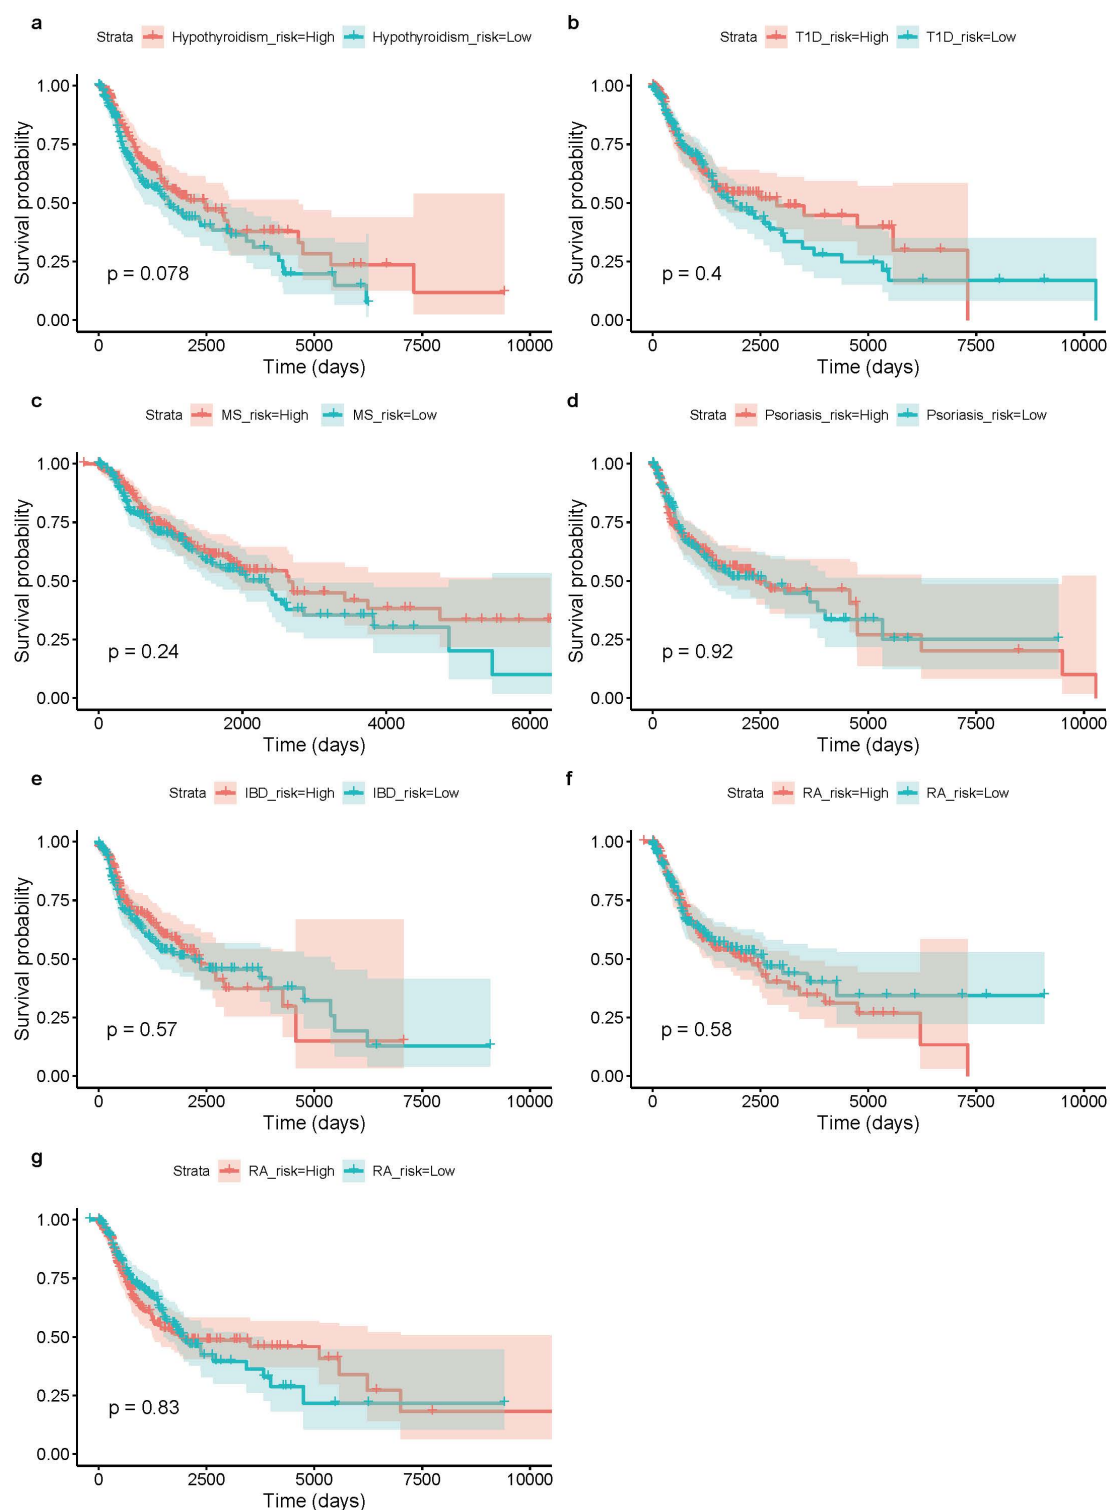

Survival curves in PCAWG typical cancer patients, stratified by PRSs in 7 autoimmune diseases. The red curve refers to those patients with high PRSs and high risk of diseases, while the blue curve refers to those with low risks. The number of individuals followed up for each time interval is shown in the table.

Supplementary Figure 3. PRS distributions stratified by different types of therapy

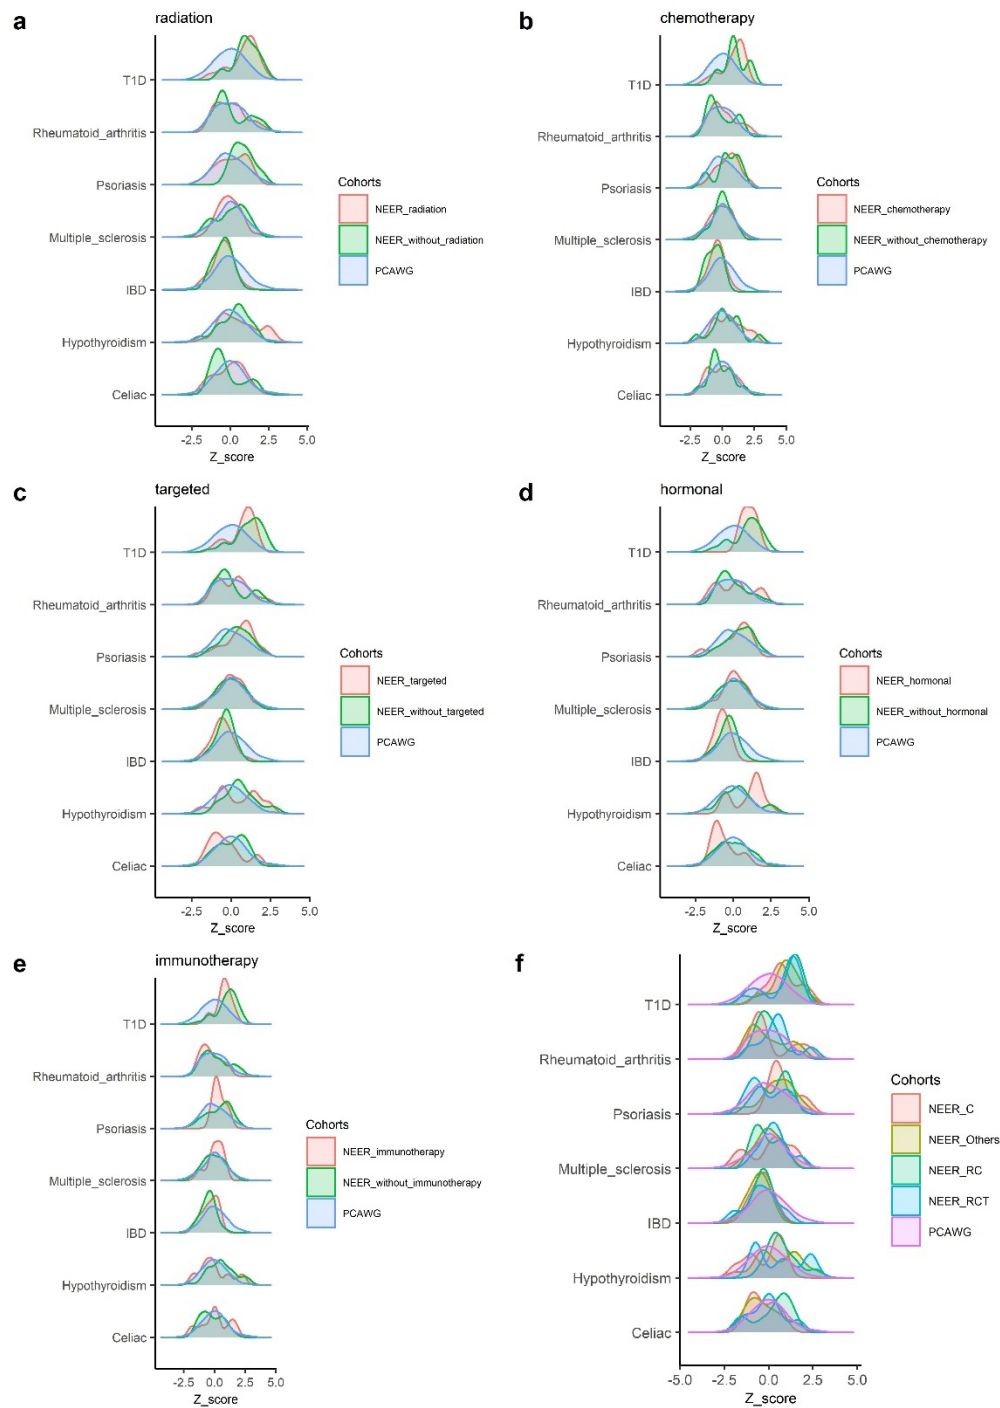

A-E) PRS distributions of seven autoimmune diseases, with NEER ERs stratified by whether received a specific type of therapy. F) PRS distributions of seven autoimmune diseases, with NEER ERs stratified by regimens (combination of therapies). NEER\_C (n=7), NEER\_RC (n=10) and NEER\_RCT (n=7) refer to chemotherapy only, a combination of radiation therapy and chemotherapy, and a combination of radiation therapy, chemotherapy and targeted therapy respectively among NEER ERs. NEER\_Others refers to the group of ERs with other combinations of therapies. Each specific combination has a sample size less than 7.

Supplementary Figure 4. 2-D PCA plot of all NEER and PCAWG patients.

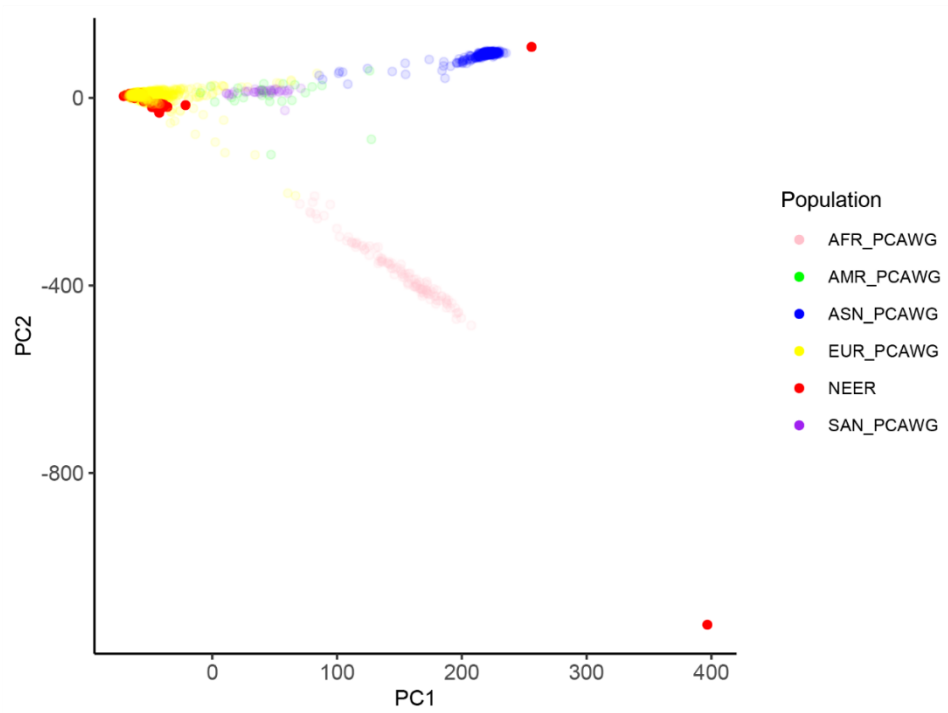

PCA was conducted among all NEER and PCAWG patients and PCAWG patients were colored by previously reported ancestry populations.

## Supplementary Methods

Study inclusion reasons for those were decided individually

Participant 1: Stopped conventional treatments after 3 years and began an anti-angiogenic diet, resulting in cancer resolving and being NED for years.

Participant 6: Was a complete responder to an IDH targeted drug and stem cell transplants.

Participant 13: Had widespread cancer but remained cancer-free after maintenance therapy for over a year.

Participant 20: Responded well to Keytruda for a rare type of melanoma not usually affected by that drug.

Participant 28: Showed no evidence of recurrence for years after chemotherapy (in a failed clinical trial) for metastatic breast cancer.

Participant 33: Greatly improved after using cannabis oil despite dire prognosis for widely metastatic breast cancer.

Participant 51: Avoided systemic treatment and had no new metastases for over 6 years after kidney cancer surgery, unique case.

## Supplementary Tables

Supplementary Table 1

|                       | <b>NEER</b> |
|-----------------------|-------------|
| N                     | 51          |
| Treatment Class, n(%) |             |
| Surgery               | 40 (78.4%)  |
| Chemotherapy          | 38 (74.5%)  |
| Radiation             | 30 (58.8%)  |
| Targeted              | 23 (45.1%)  |
| Hormonal              | 11 (21.6%)  |
| Immunotherapy         | 7 (13.7%)   |

Supplementary Table 2

| Phenotype            | Number of SNPs | Cite                                                                                                                                                                                                                    |
|----------------------|----------------|-------------------------------------------------------------------------------------------------------------------------------------------------------------------------------------------------------------------------|
| Hypothyroidism       | 1099649        | Khan, Zia, et al. "Genetic variation associated with thyroid autoimmunity shapes the systemic immune response to PD-1 checkpoint blockade." <i>Nature communications</i> 12.1 (2021): 1-12.                             |
| T1D                  | 66             | Mansour Aly, Dina, et al. "Genome-wide association analyses highlight etiological differences underlying newly defined subtypes of diabetes." <i>Nature genetics</i> 53.11 (2021): 1534-1542.                           |
| Multiple sclerosis   | 127            | Barnes, Catriona LK, et al. "Contribution of common risk variants to multiple sclerosis in Orkney and Shetland." <i>European Journal of Human Genetics</i> 29.11 (2021): 1701-1709.                                     |
| Psoriasis            | 71744          | Privé, Florian, et al. "Portability of 245 polygenic scores when derived from the UK Biobank and applied to 9 ancestry groups from the same cohort." <i>The American Journal of Human Genetics</i> 109.1 (2022): 12-23. |
| Rheumatoid arthritis | 256            | Privé, Florian, et al. "Portability of 245 polygenic scores when derived from the UK Biobank and applied to 9 ancestry groups from the same cohort." <i>The American Journal of Human Genetics</i> 109.1 (2022): 12-23. |
| IBD                  | 5784395        | Chun, Sung, et al. "Non-parametric polygenic risk prediction via partitioned GWAS summary statistics." <i>The American Journal of Human Genetics</i> 107.1 (2020): 46-59.                                               |
| Celiac               | 58231          | Privé, Florian, et al. "Portability of 245 polygenic scores when derived from the UK Biobank and applied to 9 ancestry groups from the same cohort." <i>The American Journal of Human Genetics</i> 109.1 (2022): 12-23. |

Supplementary Table 3

| id | gender | organ_system                            | age | donor_vital_status | cancer_stage | autoimmune_disease | family_autoimmune | surgery | radiation | chemotherapy | targeted | hormonal | immunotherapy | years_survived |
|----|--------|-----------------------------------------|-----|--------------------|--------------|--------------------|-------------------|---------|-----------|--------------|----------|----------|---------------|----------------|
| 1  | F      | BREAST                                  | 55  | alive              | IV           | Yes                | No                | Yes     | Yes       | Yes          | Yes      | Yes      | No            | 16.41          |
| 2  | M      | BLOOD, BONE MARROW, & HEMATOPOIETIC SYS | 55  | alive              | Binet C      | No                 | NA                | Yes     | No        | No           | No       | No       | No            | 29.95          |
| 3  | M      | PROSTATE GLAND                          | 62  | alive              | IV           | No                 | No                | Yes     | Yes       | No           | No       | Yes      | No            | 10.44          |
| 4  | M      | URINARY BLADDER                         | 57  | alive              | IV           | No                 | No                | Yes     | Yes       | Yes          | No       | No       | No            | 7.84           |
| 5  | M      | PANCREAS                                | 75  | alive              | IV           | No                 | No                | No      | Yes       | Yes          | Yes      | No       | No            | 6.31           |
| 6  | M      | BLOOD, BONE MARROW, & HEMATOPOIETIC SYS | 65  | alive              | NA           | No                 | No                | No      | Yes       | Yes          | Yes      | No       | No            | 9.11           |
| 7  | M      | PANCREAS                                | 69  | alive              | IV           | No                 | No                | Yes     | No        | Yes          | No       | No       | No            | 8.71           |
| 8  | M      | SKIN                                    | 65  | alive              | IV           | Yes                | Yes               | Yes     | Yes       | No           | No       | No       | No            | 12.44          |
| 9  | F      | OVARY                                   | 82  | alive              | IV           | No                 | Yes               | Yes     | No        | Yes          | No       | No       | No            | 30.77          |
| 10 | F      | BREAST                                  | 66  | alive              | IV           | Yes                | No                | Yes     | Yes       | Yes          | Yes      | Yes      | Yes           | 25.68          |
| 11 | F      | LUNG & BRONCHUS                         | 62  | alive              | IV           | No                 | Yes               | Yes     | Yes       | Yes          | Yes      | No       | No            | 7.10           |



|    |   |                                         |    |          |     |     |     |     |     |     |     |     |     |       |
|----|---|-----------------------------------------|----|----------|-----|-----|-----|-----|-----|-----|-----|-----|-----|-------|
| 12 | F | OVARY                                   | 66 | alive    | IV  | No  | No  | Yes | No  | Yes | No  | No  | No  | 19.24 |
| 13 | F | OVARY                                   | 66 | alive    | IV  | No  | NA  | Yes | No  | Yes | Yes | Yes | No  | 11.21 |
| 14 | M | KIDNEY                                  | 63 | deceased | IV  | Yes | No  | No  | Yes | No  | Yes | No  | Yes | 15.71 |
| 15 | F | LIVER OR GALLBLADDER                    | 50 | alive    | IV  | No  | No  | Yes | No  | Yes | No  | No  | Yes | 11.19 |
| 16 | F | UTERUS                                  | 64 | alive    | IV  | Yes | No  | Yes | Yes | Yes | No  | No  | No  | 10.32 |
| 17 | F | BREAST                                  | 61 | alive    | IV  | No  | No  | No  | Yes | Yes | Yes | No  | No  | 10.55 |
| 18 | F | PANCREAS                                | 43 | alive    | IV  | Yes | Yes | Yes | No  | Yes | No  | No  | No  | 5.86  |
| 19 | F | BREAST                                  | 70 | alive    | IV  | No  | No  | Yes | Yes | Yes | Yes | Yes | No  | 12.98 |
| 20 | F | SKIN                                    | 39 | alive    | IV  | Yes | No  | Yes | Yes | No  | No  | No  | Yes | 3.15  |
| 21 | M | BONE & SOFT TISSUE                      | 66 | alive    | III | No  | No  | Yes | Yes | No  | No  | No  | No  | 28.31 |
| 22 | M | BLOOD, BONE MARROW, & HEMATOPOIETIC SYS | 66 | alive    | NA  | No  | No  | No  | No  | No  | Yes | No  | No  | 7.06  |
| 23 | F | ESOPHAGUS OR STOMACH                    | 76 | alive    | IV  | No  | No  | No  | No  | Yes | No  | No  | No  | 9.68  |
| 24 | F | LUNG & BRONCHUS                         | 72 | alive    | IV  | NA  | NA  | NA  | NA  | Yes | Yes | NA  | NA  | 8.92  |
| 25 | F | LUNG & BRONCHUS                         | 67 | alive    | IV  | No  | No  | Yes | Yes | No  | Yes | No  | No  | 15.85 |
| 26 | F | BREAST                                  | 57 | deceased | IV  | NA  | NA  | NA  | NA  | Yes | NA  | NA  | NA  | 8.29  |

|    |   |                                                                                             |    |          |    |     |     |     |     |     |     |     |     |       |
|----|---|---------------------------------------------------------------------------------------------|----|----------|----|-----|-----|-----|-----|-----|-----|-----|-----|-------|
| 27 | F | BREAST                                                                                      | 70 | alive    | IV | No  | No  | Yes | Yes | Yes | Yes | No  | NA  | 21.42 |
| 28 | F | BREAST                                                                                      | 66 | alive    | IV | No  | No  | Yes | Yes | Yes | No  | No  | No  | 24.62 |
| 29 | M | BRAIN, &<br>CRANIAL<br>NERVES, &<br>SPINAL CORD,<br>(EXCL.<br>VENTRICLE,<br>CEREBELLUM<br>) | 67 | alive    | NA | No  | No  | Yes | Yes | Yes | No  | No  | No  | 21.86 |
| 30 | F | BREAST                                                                                      | 73 | alive    | IV | No  | No  | Yes | Yes | Yes | No  | Yes | No  | 31.18 |
| 31 | M | PANCREAS                                                                                    | 62 | alive    | IV | No  | No  | Yes | Yes | Yes | No  | No  | No  | 7.27  |
| 32 | M | BRAIN, &<br>CRANIAL<br>NERVES, &<br>SPINAL CORD,<br>(EXCL.<br>VENTRICLE,<br>CEREBELLUM<br>) | 76 | deceased | NA | No  | No  | Yes | Yes | Yes | Yes | No  | Yes | 8.53  |
| 33 | F | BREAST                                                                                      | 60 | alive    | IV | No  | No  | Yes | Yes | Yes | Yes | No  | No  | 14.42 |
| 34 | M | PANCREAS                                                                                    | 69 | alive    | IV | No  | No  | Yes | No  | Yes | Yes | No  | No  | 4.31  |
| 35 | F | LUNG &<br>BRONCHUS                                                                          | 69 | alive    | IV | Yes | No  | Yes | Yes | Yes | Yes | No  | No  | 12.77 |
| 36 | F | KIDNEY                                                                                      | 70 | alive    | IV | No  | Yes | Yes | No  | No  | Yes | No  | Yes | 15.96 |
| 37 | F | UTERUS                                                                                      | 81 | alive    | IV | No  | No  | Yes | No  | Yes | No  | No  | No  | 16.11 |

|    |   |                                                   |    |              |     |     |     |     |     |     |     |     |     |       |
|----|---|---------------------------------------------------|----|--------------|-----|-----|-----|-----|-----|-----|-----|-----|-----|-------|
| 38 | F | BREAST                                            | 76 | alive        | IV  | Yes | Yes | Yes | No  | Yes | No  | Yes | No  | 30.12 |
| 39 | M | LARGE<br>INTESTINE                                | 70 | alive        | IV  | No  | No  | Yes | No  | Yes | Yes | No  | No  | 16.94 |
| 40 | F | OVARY                                             | 75 | alive        | IV  | No  | No  | Yes | No  | Yes | No  | Yes | No  | 16.78 |
| 41 | M | LARGE<br>INTESTINE                                | 79 | alive        | IV  | NA  | NA  | Yes | Yes | Yes | No  | No  | No  | 12.88 |
| 42 | M | PANCREAS                                          | 87 | alive        | III | No  | Yes | Yes | Yes | Yes | No  | No  | No  | 19.14 |
| 43 | F | BREAST                                            | 67 | alive        | IV  | No  | No  | Yes | Yes | Yes | Yes | Yes | No  | 30.65 |
| 44 | F | BLOOD, BONE<br>MARROW, &<br>HEMATOPOIE<br>TIC SYS | 67 | alive        | NA  | Yes | No  | No  | No  | No  | Yes | No  | No  | 10.01 |
| 45 | M | THYROID<br>GLAND                                  | 54 | alive        | IV  | No  | No  | Yes | Yes | Yes | No  | No  | Yes | 11.17 |
| 46 | F | UTERUS                                            | 66 | alive        | IV  | No  | No  | Yes | Yes | Yes | No  | No  | No  | 10.67 |
| 47 | F | LUNG &<br>BRONCHUS                                | 66 | alive        | IV  | No  | Yes | Yes | Yes | Yes | No  | No  | No  | 11.44 |
| 48 | M | PANCREAS                                          | 71 | alive        | IV  | No  | No  | Yes | Yes | Yes | No  | No  | No  | 14.10 |
| 49 | F | BREAST                                            | 65 | decease<br>d | IV  | NA  | NA  | NA  | NA  | NA  | Yes | Yes | NA  | 19.42 |
| 50 | F | BREAST                                            | 73 | alive        | IV  | NA  | NA  | NA  | NA  | NA  | Yes | Yes | NA  | 15.71 |
| 51 | M | KIDNEY                                            | 55 | alive        | IV  | No  | No  | Yes | No  | No  | No  | No  | No  | 8.16  |

Supplementary Table 4

| snp_id      | eQTL    | Nearest gene         | functional_consequence                                            | chr | position  | effect_weight | n_alt_alleles_pcaswg | percentage_alt_alleles_pcaswg | n_alt_alleles_neer | percentage_alt_alleles_neer | odds_ratio (PCAWG/NEER) | p     | p.adj |
|-------------|---------|----------------------|-------------------------------------------------------------------|-----|-----------|---------------|----------------------|-------------------------------|--------------------|-----------------------------|-------------------------|-------|-------|
| rs10840442  | -       | IGF2, INS-IGF2       | intron_variant, upstream_transcript_variant, 2KB_upstream_variant | 11  | 2171922   | 0.153         | 142                  | 0.171                         | 16                 | 0.157                       | 1.112                   | 0.781 | 0.998 |
| rs11066320  | ALDH2   | PTPN11, LOC124903023 | intron_variant                                                    | 12  | 112906415 | 0.209         | 463                  | 0.559                         | 51                 | 0.500                       | 1.268                   | 0.291 | 0.844 |
| rs11203203  | UBASH3A | UBASH3A              | 5_prime_UTR_variant, intron_variant                               | 21  | 43836186  | 0.150         | 320                  | 0.386                         | 38                 | 0.373                       | 1.061                   | 0.830 | 1.000 |
| rs113010081 | CCR3    | None                 |                                                                   | 3   | 46457412  | -0.164        | 90                   | 0.109                         | 8                  | 0.078                       | 1.432                   | 0.398 | 0.861 |
| rs117693013 | TRPM5   | None                 |                                                                   | 11  | 2198479   | -0.421        | 44                   | 0.053                         | 3                  | 0.029                       | 1.851                   | 0.469 | 0.861 |
| rs12128454  | PTPN22  | None                 |                                                                   | 1   | 113910209 | 0.274         | 87                   | 0.105                         | 11                 | 0.108                       | 0.971                   | 0.865 | 1.000 |
| rs12150079  | GSDMB   | ZBP2                 | intron_variant                                                    | 17  | 38025417  | 0.114         | 263                  | 0.318                         | 38                 | 0.373                       | 0.784                   | 0.264 | 0.844 |

|            |          |                    |                                                                                        |    |           |        |     |       |    |       |       |       |       |
|------------|----------|--------------------|----------------------------------------------------------------------------------------|----|-----------|--------|-----|-------|----|-------|-------|-------|-------|
| rs12284746 | C11orf21 | None               |                                                                                        | 11 | 2277229   | 0.182  | 65  | 0.079 | 15 | 0.147 | 0.495 | 0.037 | 0.606 |
| rs12416116 | RNLS     | RNLS, LOC101929727 | intron_variant, genic_upstream_transcript_variant, genic_downstream_transcript_variant | 10 | 90035654  | -0.165 | 242 | 0.292 | 36 | 0.353 | 0.757 | 0.209 | 0.844 |
| rs1456988  | -        | None               |                                                                                        | 14 | 98488007  | 0.111  | 608 | 0.734 | 70 | 0.686 | 1.263 | 0.345 | 0.861 |
| rs1503836  | DCLRE1B  | None               |                                                                                        | 1  | 114541498 | 0.145  | 346 | 0.418 | 44 | 0.431 | 0.946 | 0.832 | 1.000 |
| rs151233   | TUFM     | APOBR              | synonymous_variant, coding_sequence_variant                                            | 16 | 28506428  | 0.171  | 108 | 0.130 | 22 | 0.216 | 0.546 | 0.023 | 0.514 |
| rs1539438  | AP4B1    | BCL2L15, AP4B1-AS1 | intron_variant, upstream_transcript_variant, 2KB_upstream_variant                      | 1  | 114430356 | -0.157 | 548 | 0.662 | 65 | 0.637 | 1.114 | 0.658 | 0.966 |
| rs1574285  | -        | GLIS3              | intron_variant, genic_upstream_transcript_variant                                      | 9  | 4283137   | 0.115  | 466 | 0.563 | 55 | 0.539 | 1.100 | 0.673 | 0.966 |

|            |       |                        |                                                                                                               |    |           |        |     |       |    |       |       |       |       |
|------------|-------|------------------------|---------------------------------------------------------------------------------------------------------------|----|-----------|--------|-----|-------|----|-------|-------|-------|-------|
| rs1701704  | RAB5B | IKZF4,<br>LOC105369781 | intron_variant,<br>genic_upstream_transcript_variant                                                          | 12 | 56412487  | 0.223  | 264 | 0.319 | 28 | 0.275 | 1.237 | 0.429 | 0.861 |
| rs17630235 | ALDH2 | TRAFD1                 | 500B_downstream_variant,<br>downstream_transcript_variant                                                     | 12 | 112591686 | 0.222  | 353 | 0.426 | 51 | 0.500 | 0.743 | 0.169 | 0.844 |
| rs1893217  | -     | PTPN2                  | intron_variant                                                                                                | 18 | 12809340  | 0.192  | 116 | 0.140 | 14 | 0.137 | 1.024 | 1.000 | 1.000 |
| rs193779   | RMI2  | SOCS1,<br>LOC105371082 | intron_variant,<br>2KB_upstream_variant,<br>genic_upstream_transcript_variant,<br>upstream_transcript_variant | 16 | 11350965  | 0.129  | 211 | 0.255 | 25 | 0.245 | 1.053 | 0.904 | 1.000 |
| rs2045258  | CENPW | CENPW                  | intron_variant,<br>genic_downstream_transcript_variant                                                        | 6  | 126674354 | 0.117  | 397 | 0.479 | 58 | 0.569 | 0.699 | 0.094 | 0.844 |
| rs2111485  | -     | LOC105373724           | genic_downstream_transcript_variant,<br>intron_variant                                                        | 2  | 163110536 | -0.165 | 488 | 0.589 | 62 | 0.608 | 0.926 | 0.750 | 0.998 |

|            |         |         |                                                                                                                       |    |           |        |     |       |    |       |       |       |       |
|------------|---------|---------|-----------------------------------------------------------------------------------------------------------------------|----|-----------|--------|-----|-------|----|-------|-------|-------|-------|
| rs229533   | C1QTNF6 | C1QTNF6 | genic_upstream_transcript_variant,intron_variant                                                                      | 22 | 37587111  | 0.107  | 387 | 0.467 | 52 | 0.510 | 0.844 | 0.462 | 0.861 |
| rs2304256  | TYK2    | TYK2    | missense_variant,coding_sequence_variant,genic_upstream_transcript_variant,intron_variant,upstream_transcript_variant | 19 | 10475652  | -0.139 | 242 | 0.292 | 24 | 0.235 | 1.342 | 0.247 | 0.844 |
| rs3087243  | CTLA4   | CTLA4   | 500B_downstream_variant,downstream_transcript_variant                                                                 | 2  | 204738919 | -0.178 | 395 | 0.477 | 41 | 0.402 | 1.357 | 0.172 | 0.844 |
| rs3184504  | SH2B3   | SH2B3   | synonymous_variant,missense_variant,coding_sequence_variant,5_prime_UTR_variant                                       | 12 | 111884608 | -0.266 | 437 | 0.528 | 46 | 0.451 | 1.360 | 0.172 | 0.844 |
| rs34593439 | CTSH    | CTSH    | intron_variant                                                                                                        | 15 | 79234957  | -0.246 | 84  | 0.101 | 8  | 0.078 | 1.326 | 0.598 | 0.953 |

|           |          |          |                                                                                                  |    |           |        |     |       |    |       |       |       |       |
|-----------|----------|----------|--------------------------------------------------------------------------------------------------|----|-----------|--------|-----|-------|----|-------|-------|-------|-------|
| rs34835   | SPNS1    | CLN3     | intron_variant                                                                                   | 16 | 28499291  | -0.121 | 349 | 0.421 | 38 | 0.373 | 1.227 | 0.395 | 0.861 |
| rs3842727 | C11orf21 | TH       | downstream_transcript_variant,500B_downstream_variant                                            | 11 | 2184848   | -0.687 | 563 | 0.680 | 76 | 0.745 | 0.727 | 0.213 | 0.844 |
| rs3842763 | -        | INS-IGF2 | intron_variant                                                                                   | 11 | 2179204   | 0.149  | 232 | 0.280 | 29 | 0.284 | 0.980 | 0.908 | 1.000 |
| rs402072  | FKRP     | PRKD2    | genic_upstream_transcript_variant,upstream_transcript_variant,5_prime_UTR_variant,intron_variant | 19 | 47219122  | -0.142 | 140 | 0.169 | 17 | 0.167 | 1.017 | 1.000 | 1.000 |
| rs4378452 | GPN3     | CUX2     | intron_variant,genic_upstream_transcript_variant                                                 | 12 | 111504033 | 0.144  | 281 | 0.339 | 43 | 0.422 | 0.705 | 0.123 | 0.844 |
| rs4766897 | SH2B3    | ACAD10   | intron_variant                                                                                   | 12 | 112179471 | 0.189  | 569 | 0.687 | 66 | 0.647 | 1.198 | 0.431 | 0.861 |
| rs4767000 | OAS1     | RPH3A    | intron_variant,genic_upstream_transcript_variant                                                 | 12 | 113168368 | 0.116  | 453 | 0.547 | 45 | 0.441 | 1.529 | 0.046 | 0.606 |



|            |       |                    |                                                                            |    |           |        |     |       |    |       |       |       |       |
|------------|-------|--------------------|----------------------------------------------------------------------------|----|-----------|--------|-----|-------|----|-------|-------|-------|-------|
| rs4820830  | MTMR3 | HORMAD2            | intron_variant                                                             | 22 | 30531091  | 0.135  | 521 | 0.629 | 59 | 0.578 | 1.237 | 0.331 | 0.861 |
| rs4839318  | -     | None               |                                                                            | 1  | 113918302 | -0.113 | 301 | 0.364 | 31 | 0.304 | 1.308 | 0.274 | 0.844 |
| rs4849135  | -     | ACOXL              | intron_variant                                                             | 2  | 111615079 | -0.115 | 599 | 0.723 | 74 | 0.725 | 0.990 | 1.000 | 1.000 |
| rs516246   | FUT2  | FUT2, LOC105447645 | non_coding_transcript_variant,intron_variant                               | 19 | 49206172  | -0.143 | 374 | 0.452 | 59 | 0.578 | 0.601 | 0.020 | 0.514 |
| rs56994090 | -     | MEG3               | intron_variant                                                             | 14 | 101306447 | -0.129 | 347 | 0.419 | 47 | 0.461 | 0.844 | 0.458 | 0.861 |
| rs5752973  | MTMR3 | None               |                                                                            | 22 | 30264274  | 0.123  | 331 | 0.400 | 47 | 0.461 | 0.780 | 0.242 | 0.844 |
| rs6043409  | SIRPG | SIRPG, SIRPG-AS1   | 3_prime_UTR_variant,misense_variant,intron_variant,coding_sequence_variant | 20 | 1616206   | -0.126 | 544 | 0.657 | 74 | 0.725 | 0.725 | 0.183 | 0.844 |
| rs61819372 | -     | MAGI3              | intron_variant                                                             | 1  | 114072110 | 0.428  | 7   | 0.008 | 1  | 0.010 | 0.861 | 0.607 | 0.953 |
| rs61839660 | IL2RA | IL2RA              | intron_variant                                                             | 10 | 6094697   | -0.472 | 66  | 0.080 | 11 | 0.108 | 0.717 | 0.340 | 0.861 |
| rs62447205 | IKZF1 | IKZF1              | intron_variant,genic_downstr                                               | 7  | 50465830  | -0.117 | 212 | 0.256 | 25 | 0.245 | 1.060 | 0.904 | 1.000 |

|                |              |                       |                                                                         |    |               |        |     |       |    |       |       |       |       |
|----------------|--------------|-----------------------|-------------------------------------------------------------------------|----|---------------|--------|-----|-------|----|-------|-------|-------|-------|
|                |              |                       | eam_transcript<br>_variant                                              |    |               |        |     |       |    |       |       |       |       |
| rs65789<br>97  | C11orf2<br>1 | None                  |                                                                         | 11 | 2220414       | -0.320 | 75  | 0.091 | 7  | 0.069 | 1.351 | 0.580 | 0.953 |
| rs66690<br>08  | PHTF1        | MAGI3                 | intron_variant                                                          | 1  | 1141665<br>61 | -0.161 | 351 | 0.424 | 49 | 0.480 | 0.796 | 0.290 | 0.844 |
| rs66796<br>77  | PTPN22       | PHTF1                 | 2KB_upstream<br>_variant,upstre<br>am_transcript_<br>variant            | 1  | 1143038<br>08 | 0.636  | 82  | 0.099 | 12 | 0.118 | 0.825 | 0.600 | 0.953 |
| rs66919<br>77  | DDX59        | CAMS<br>AP2           | intron_variant                                                          | 1  | 2008149<br>59 | 0.126  | 173 | 0.209 | 21 | 0.206 | 1.019 | 1.000 | 1.000 |
| rs68277<br>56  | KIAA11<br>09 | KIAA11<br>09          | intron_variant                                                          | 4  | 1231844<br>11 | 0.131  | 507 | 0.612 | 63 | 0.618 | 0.978 | 1.000 | 1.000 |
| rs68361<br>89  | -            | IL21,<br>IL21-<br>AS1 | intron_variant                                                          | 4  | 1235413<br>41 | 0.127  | 480 | 0.580 | 59 | 0.578 | 1.005 | 1.000 | 1.000 |
| rs70732<br>36  | IL2RA        | None                  |                                                                         | 10 | 6106552       | 0.190  | 347 | 0.419 | 40 | 0.392 | 1.118 | 0.671 | 0.966 |
| rs72396<br>71  | DOK6         | CD226                 | genic_downstr<br>eam_transcript<br>_variant,3_pri<br>me_UTR_vari<br>ant | 18 | 6752326<br>0  | 0.121  | 397 | 0.479 | 43 | 0.422 | 1.264 | 0.294 | 0.844 |
| rs72687<br>906 | MAGI3        | None                  |                                                                         | 1  | 1139222<br>69 | 0.480  | 25  | 0.030 | 2  | 0.020 | 1.556 | 0.759 | 0.998 |

|            |          |             |                                                    |    |           |        |     |       |    |       |       |       |       |
|------------|----------|-------------|----------------------------------------------------|----|-----------|--------|-----|-------|----|-------|-------|-------|-------|
| rs72687939 | PTPN22   | MAGI3       | intron_variant                                     | 1  | 114011306 | 0.180  | 123 | 0.149 | 15 | 0.147 | 1.012 | 1.000 | 1.000 |
| rs72727394 | RASGRP1  | RASGRP1     | intron_variant                                     | 15 | 38847022  | 0.138  | 176 | 0.213 | 18 | 0.176 | 1.259 | 0.441 | 0.861 |
| rs72853903 | TH       | None        |                                                    | 11 | 2198665   | -0.278 | 233 | 0.281 | 26 | 0.255 | 1.144 | 0.640 | 0.966 |
| rs72853956 | TSPAN32  | None        |                                                    | 11 | 2222271   | -0.421 | 32  | 0.039 | 3  | 0.029 | 1.326 | 1.000 | 1.000 |
| rs72928038 | BACH2    | BACH2       | intron_variant                                     | 6  | 90976768  | 0.180  | 151 | 0.182 | 20 | 0.196 | 0.915 | 0.786 | 0.998 |
| rs7396243  | TH       | None        |                                                    | 11 | 2205892   | -0.295 | 492 | 0.594 | 65 | 0.637 | 0.834 | 0.454 | 0.861 |
| rs741172   | DEXI     | CLEC16A     | intron_variant,genic_downstream_transcript_variant | 16 | 11200798  | -0.194 | 276 | 0.333 | 28 | 0.275 | 1.321 | 0.264 | 0.844 |
| rs7480143  | -        | None        |                                                    | 11 | 2225023   | 0.171  | 109 | 0.132 | 24 | 0.235 | 0.493 | 0.007 | 0.458 |
| rs77347828 | -        | LOC10928080 | intron_variant                                     | 10 | 6168290   | 0.159  | 106 | 0.128 | 14 | 0.137 | 0.923 | 0.756 | 0.998 |
| rs7893467  | -        | IL2RA       | intron_variant                                     | 10 | 6079035   | 0.196  | 763 | 0.921 | 90 | 0.882 | 1.564 | 0.182 | 0.844 |
| rs7925375  | C11orf21 | TH          | intron_variant                                     | 11 | 2191155   | 0.178  | 631 | 0.762 | 74 | 0.725 | 1.212 | 0.462 | 0.861 |
| rs8056814  | CFDP1    | CTRB1       | 2KB_upstream_variant,upstre                        | 16 | 75252327  | 0.278  | 76  | 0.092 | 11 | 0.108 | 0.836 | 0.589 | 0.953 |

|           |        |       |                                                   |    |           |        |     |       |    |       |       |       |       |
|-----------|--------|-------|---------------------------------------------------|----|-----------|--------|-----|-------|----|-------|-------|-------|-------|
|           |        |       | am_transcript_variant                             |    |           |        |     |       |    |       |       |       |       |
| rs853981  | CENPW  | None  |                                                   | 6  | 127045460 | -0.107 | 404 | 0.488 | 42 | 0.412 | 1.361 | 0.172 | 0.844 |
| rs9585056 | TM9SF2 | None  |                                                   | 13 | 100081766 | 0.116  | 613 | 0.740 | 74 | 0.725 | 1.079 | 0.722 | 0.998 |
| rs977986  | CFDP1  | CHST6 | non_coding_transcript_variant,3_prime_UTR_variant | 16 | 75506696  | 0.171  | 701 | 0.847 | 84 | 0.824 | 1.183 | 0.563 | 0.953 |

Supplementary Table 5

| snp_id    | gene    | odds_ratio | p_value | p_adjust | Function to T1D |
|-----------|---------|------------|---------|----------|-----------------|
| rs6669008 | MAGI3   | 0.319      | 0.0013  | 0.074    | protective      |
| rs1539438 | BCL2L15 | 4.64       | 0.0058  | 0.095    | susceptible     |
| rs3842727 | TH      | 5.202      | 0.0026  | 0.074    | susceptible     |
| rs3184504 | SH2B3   | 0.179      | 0.0033  | 0.074    | protective      |
